# Supplementary material
Source: PubMed Central journal article supplement (PMC9969662)

## Supporting Information

### A. Details about molecular features

Table S1: Atom and bond features

| Feature Type         | Attribute     | Size | Description                                                                                  |
|----------------------|---------------|------|----------------------------------------------------------------------------------------------|
| <b>Atom Features</b> | Atom type     | 100  | Chemical elements with atomic number $\leq 100$                                              |
|                      | Degree        | 6    | No. of bonds in which the atom is involved                                                   |
|                      | Formal charge | 5    | Electronic charge assigned to an atom                                                        |
|                      | Chirality     | 4    | Unspecified, tetrahedral CW/CCW, or other types of chirality                                 |
|                      | Number of H   | 5    | No. of bonded hydrogen atoms                                                                 |
|                      | Hybridization | 5    | sp, sp <sup>2</sup> , sp <sup>3</sup> , sp <sup>3</sup> d, or sp <sup>3</sup> d <sup>2</sup> |
|                      | Aromaticity   | 1    | Whether the atom is a component of an aromatic system                                        |
|                      | Atomic mass   | 1    | Mass of the atom (divided by 100)                                                            |
| <b>Bond Features</b> | Bond type     | 4    | Single, double, triple, or aromatic                                                          |
|                      | Conjugated    | 1    | Whether the bond is conjugated                                                               |
|                      | Ring          | 1    | Whether the bond is in a ring                                                                |
|                      | Stereo        | 6    | Stereochemistry of bonds (none, any, E/Z or cis/trans)                                       |

Table S2: 200 Molecular descriptors generated by RDKit

| Module                   | Descriptor Name         |                          |                         |                          |
|--------------------------|-------------------------|--------------------------|-------------------------|--------------------------|
| <b>Graph Descriptors</b> | BalabanJ                | BertzCT                  | Chi0                    | Chi0n                    |
|                          | Chi0v                   | Chi1                     | Chi1n                   | Chi1v                    |
|                          | Chi2n                   | Chi2v                    | Chi3n                   | Chi3v                    |
|                          | Chi4n                   | Chi4v                    | HallKierAlpha           | Ipc                      |
|                          | Kappa1                  | Kappa2                   | Kappa3                  |                          |
| <b>Descriptors</b>       | ExactMolWt              | FpDensityMorgan1         | FpDensityMorgan2        | FpDensityMorgan3         |
|                          | HeavyAtomMolWt          | MaxAbsPartialCharge      | MaxPartialCharge        | MinAbsPartialCharge      |
|                          | MinPartialCharge        | MolWt                    | NumRadicalElectrons     | NumValenceElectrons      |
| <b>Lipinski</b>          | FractionCSP3            | HeavyAtomCount           | NHOHCount               | NOCCount                 |
|                          | NumAliphaticCarbocycles | NumAliphaticHeterocycles | NumAliphaticRings       | NumAromaticCarbocycles   |
|                          | NumAromaticHeterocycles | NumAromaticRings         | NumHAcceptors           | NumHDonors               |
|                          | NumHeteroatoms          | NumRotatableBonds        | NumSaturatedCarbocycles | NumSaturatedHeterocycles |
|                          | NumSaturatedRings       | RingCount                |                         |                          |
| <b>EState_VSA</b>        | EState_VSA1             | EState_VSA10             | EState_VSA11            | EState_VSA2              |
|                          | EState_VSA3             | EState_VSA4              | EState_VSA5             | EState_VSA6              |
|                          | EState_VSA7             | EState_VSA8              | EState_VSA9             | VSA_EState1              |
|                          | VSA_EState10            | VSA_EState2              | VSA_EState3             | VSA_EState4              |

|                  | VSA_EState5<br>VSA_EState9 | VSA_EState6     | VSA_EState7            | VSA_EState8       |
|------------------|----------------------------|-----------------|------------------------|-------------------|
| <b>EState</b>    | MaxAbsEStateIndex          | MaxEStateIndex  | MinAbsEStateIndex      | MinEStateIndex    |
| <b>Crippen</b>   | MolLogP                    | MolMR           |                        |                   |
|                  | LabuteASA                  | PEOE_VSA1       | PEOE_VSA10             | PEOE_VSA11        |
|                  | PEOE_VSA12                 | PEOE_VSA13      | PEOE_VSA14             | PEOE_VSA2         |
|                  | PEOE_VSA3                  | PEOE_VSA4       | PEOE_VSA5              | PEOE_VSA6         |
|                  | PEOE_VSA7                  | PEOE_VSA8       | PEOE_VSA9              | SMR_VSA1          |
|                  | SMR_VSA10                  | SMR_VSA2        | SMR_VSA3               | SMR_VSA4          |
| <b>MolSurf</b>   | SMR_VSA5                   | SMR_VSA6        | SMR_VSA7               | SMR_VSA8          |
|                  | SMR_VSA9                   | SlogP_VSA1      | SlogP_VSA10            | SlogP_VSA11       |
|                  | SlogP_VSA12                | SlogP_VSA2      | SlogP_VSA3             | SlogP_VSA4        |
|                  | SlogP_VSA5                 | SlogP_VSA6      | SlogP_VSA7             | SlogP_VSA8        |
|                  | SlogP_VSA9                 | TPSA            |                        |                   |
|                  | fr_Al_COO                  | fr_Al_OH        | fr_Al_OH_noTert        | fr_ArN            |
|                  | fr_Ar_COO                  | fr_Ar_N         | fr_Ar_NH               | fr_Ar_OH          |
|                  | fr_COO                     | fr_COO2         | fr_C_O                 | fr_C_O_noCOO      |
|                  | fr_C_S                     | fr_HOCCN        | fr_Imine               | fr_NH0            |
|                  | fr_NH1                     | fr_NH2          | fr_N_O                 | fr_Ndealkylation1 |
|                  | fr_Ndealkylation2          | fr_Nhpyrrole    | fr_SH                  | fr_aldehyde       |
|                  | fr_alkyl_carbamate         | fr_alkyl_halide | fr_allylic_oxid        | fr_amide          |
|                  | fr_amidine                 | fr_aniline      | fr_aryl_methyl         | fr_azide          |
|                  | fr_azo                     | fr_barbitur     | fr_benzene             | fr_benzodiazepine |
|                  | fr_bicyclic                | fr_diazo        | fr_dihydropyridine     | fr_epoxide        |
|                  | fr_ester                   | fr_ether        | fr_furan               | fr_guanido        |
|                  | fr_halogen                 | fr_hdrzine      | fr_hdrzone             | fr_imidazole      |
|                  | fr_imide                   | fr_isocyan      | fr_isothiocyan         | fr_ketone         |
| <b>Fragments</b> | fr_ketone_Topliiss         | fr_lactam       | fr_lactone             | fr_methoxy        |
|                  | fr_morpholine              | fr_nitrile      | fr_nitro               | fr_nitro_ arom    |
|                  | fr_nitro_ arom_nonortho    | fr_nitroso      | fr_oxazole             | fr_oxime          |
|                  | fr_para_hydroxylation      | fr_phenol       | fr_phenol_noOrthoHbond | fr_phos_acid      |
|                  | fr_phos_ester              | fr_piperdine    | fr_piperzine           | fr_priamide       |
|                  | fr_prisulfonamd            | fr_pyridine     | fr_quatN               | fr_sulfide        |
|                  | fr_sulfonamd               | fr_sulfone      | fr_term_acetylene      | fr_tetrazole      |
|                  | fr_thiazole                | fr_thiocyan     | fr_thiophene           | fr_unbrch_alkane  |
|                  | fr_urea                    |                 |                        |                   |
| <b>QED</b>       | ged                        |                 |                        |                   |

## B. Details about self-attention mechanisms inside ABT-MPNN

Table S3: Algorithm of Bond Attention

| <b>Initialization</b>                                                                                                                                                                                                             |                                                                                                                                                                                        |
|-----------------------------------------------------------------------------------------------------------------------------------------------------------------------------------------------------------------------------------|----------------------------------------------------------------------------------------------------------------------------------------------------------------------------------------|
| At iteration $t$ , given a molecular graph $G$ with $N$ bonds, the input bond message matrix $H_b = [m_{b_1}^t, \dots, m_{b_i}^t, \dots, m_{b_{2N}}^t]$ . $H_b \in \mathbb{R}^{2N \times d}$ , where $d$ is the hidden dimension. |                                                                                                                                                                                        |
| 1)                                                                                                                                                                                                                                | $Q_b = [q_{b_1}, \dots, q_{b_i}, \dots, q_{b_{2N}}] = H_b$<br>$K_b = [k_{b_1}, \dots, k_{b_i}, \dots, k_{b_{2N}}] = H_b$<br>$V_b = [v_{b_1}, \dots, v_{b_i}, \dots, v_{b_{2N}}] = H_b$ |
| <b>Bond Attention</b>                                                                                                                                                                                                             |                                                                                                                                                                                        |
| 1)                                                                                                                                                                                                                                | for each bond message $b_i$ :                                                                                                                                                          |
| 2)                                                                                                                                                                                                                                | $\alpha_{b_i} \leftarrow \frac{\exp(q_{b_i} w_q / \sqrt{d})}{\sum_{j=1}^{2N} \exp(q_{b_j} w_q / \sqrt{d})}$                                                                            |
| 3)                                                                                                                                                                                                                                | $q_b \leftarrow \sum_{i=1}^{2N} \alpha_{b_i} q_{b_i}$                                                                                                                                  |
| 4)                                                                                                                                                                                                                                | $p_{b_i} \leftarrow q_b * k_{b_i}$                                                                                                                                                     |
| 5)                                                                                                                                                                                                                                | $\beta_{b_i} \leftarrow \frac{\exp(p_{b_i} w_k / \sqrt{d})}{\sum_{j=1}^{2N} \exp(p_{b_j} w_k / \sqrt{d})}$                                                                             |
| 6)                                                                                                                                                                                                                                | $k_b \leftarrow \sum_{i=1}^{2N} \beta_{b_i} k_{b_i}$                                                                                                                                   |
| 7)                                                                                                                                                                                                                                | $u_{b_i} \leftarrow k_b * v_{b_i}$                                                                                                                                                     |
| 8)                                                                                                                                                                                                                                | $r_{b_i} \leftarrow u_{b_i} w_r + q_{b_i}$                                                                                                                                             |
| 9)                                                                                                                                                                                                                                | $O_b \leftarrow \text{Layernorm}([r_{b_1}, \dots, r_{b_{2N}}])$                                                                                                                        |

Table S4: Algorithm of Atom Attention

| <b>Initialization</b> |                                                                                                                                                                                                                                                                                                    |
|-----------------------|----------------------------------------------------------------------------------------------------------------------------------------------------------------------------------------------------------------------------------------------------------------------------------------------------|
| 1)                    | Given a molecular graph $G$ with $M$ atoms, the input atom hidden matrix $H_a = [m_{a_1}, \dots, m_{a_i}, \dots, m_{a_M}]$ . $H_a \in \mathbb{R}^{M \times d}$ , where $d$ is the hidden dimension.<br>$Q_a = K_a = V_a = H_a$                                                                     |
| 2)                    | If $head_1$ or $head_2$ : $M_{graph} = \lambda \cdot M_{Adjacency} \in \mathbb{R}^{M \times M}$<br>If $head_3$ or $head_4$ : $M_{graph} = \lambda \cdot M_{Distance} \in \mathbb{R}^{M \times M}$<br>If $head_5$ or $head_6$ : $M_{graph} = \lambda \cdot M_{Coulomb} \in \mathbb{R}^{M \times M}$ |
| <b>Atom Attention</b> |                                                                                                                                                                                                                                                                                                    |
| 1)                    | $A_a \leftarrow \frac{Q_a W_Q (K_a W_K)^T}{\sqrt{d}} + M_{graph}$                                                                                                                                                                                                                                  |
| 2)                    | $O_a \leftarrow \text{Layernorm}(\text{Softmax}(A_a) V_a W_V)$                                                                                                                                                                                                                                     |

## C. Details about the ablation study of ABT-MPNN

**Fig. S1 Comparison of ablation experiments using 5-fold cross-validation (A)** Performance evaluation of each fold for the classification task (ClinTox) measured with AUROC. Experiments settings: #1: baseline; #2: use bond attention (Transformer); #3: use bond attention (Fastformer); #4 use atom attention; #5 use atom attention with inter-atomic matrices #6 use bond attention (Fastformer) and atom attention; #7 use bond attention (Fastformer) and atom attention with inter-atomic matrices (B) Performance evaluation of each fold for the regression task (ESOL) measured by RMSE. The settings of each experiment in the regression task are identical to those in the classification one.

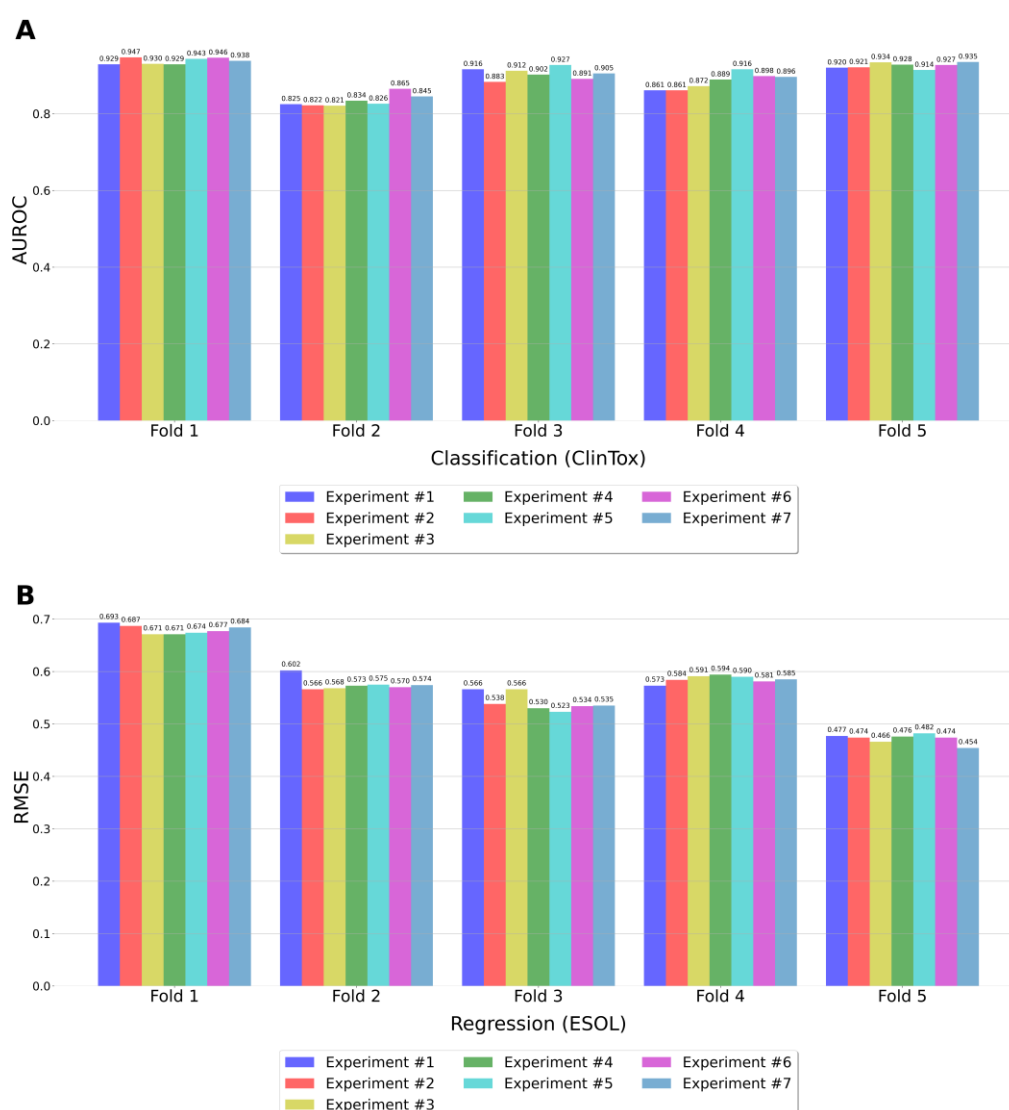

Supplement: 13321_2023_698_MOESM1_ESM.pdf [file 13321_2023_698_MOESM1_ESM.pdf]
